# Supplementary material for: The novel role of LDHA/LDHB in the prognostic value and tumor-immune infiltration in clear cell renal cell carcinoma
Source: PeerJ. 2023 Aug 1;11:e15749. doi: 10.7717/peerj.15749 (PMC10402698; doi:10.7717/peerj.15749)
Supplement: Data S1 [file peerj-11-15749-s007.xlsx]

## Sheet: Cover page
	The novel role of LDHA/LDHB in the prognostic value and tumor-immune infiltration in clear cell renal cell carcinoma
	Jie Chen1, Fei Wu2,3, Yehua Cao4, Yuanxin Xing5, Qingyong Liu3*, Zuohui Zhao6*
	1 Department of Urology, Jinan Central Hospital, Cheeloo College of Medicine, Shandong University, Jinan, Shandong, China
	2 Department of Urology, Shandong Provincial Hospital Affiliated to Shandong First Medical University, Shandong First Medical University &Shandong Academy of Medical Sciences, Jinan, Shandong, China.
	3 Department of Urology, The First Affiliated Hospital of Shandong First Medical University & Shandong Provincial Qianfoshan Hospital, Jinan, Shandong, China
	4 Department of Gastroenterology, Jinan Central Hospital, Cheeloo College of Medicine, Shandong University, Jinan, Shandong, China
	5 Central Laboratory, Jinan Central Hospital, Cheeloo College of Medicine, Shandong University, Jinan, Shandong, China
	6 Department of Pediatric Surgery, The First Affiliated Hospital of Shandong First Medical University & Shandong Provincial Qianfoshan Hospital, Jinan, Shandong, China
	Corresponding Author:
	Qingyong Liu1
	Jingshi Road, No. 16766, Jinan, Shandong, 250014, China
	Email address: lqylbc@163.com
	Zuohui Zhao2
	Email address: zhaozuohui@126.com, zhaozuohui@sdhospital.com.cn

## Sheet: parameter
Pathology	Survival (0:Yes, 1:no)	follow-up (month)	Sex(1:M,2:F)	Age(1<57,2≥57)	Grade（1:Ⅰ-Ⅱ，2：Ⅲ-Ⅳ）	Size(1<7,2≥7)	T stage	Metastases（1:n,2:y)	AJCC stage(3:3-4)	LDHA(1:low,2:high)	LDHB(1:low,2:high)
ccRCC	0	90	1	2	1	1	1	1	1	1	2
ccRCC	1	14	1	1	2	2	1	1	1	2	1
ccRCC	0	90	1	2	1	1	1	1	1	1	2
ccRCC	0	90	1	2	2	1	1	1	1	2	1
ccRCC	1	24	1	1	1	1	1	1	1	2	1
ccRCC	0	89	1	1	1	1	1	1	1	1	2
ccRCC	0	88	1	1	2	1	1	1	1	2	1
ccRCC	0	88	1	1	2	1	1	1	1	2	2
ccRCC	0	88	2	1	1	1	1	1	1	1	2
ccRCC	0	88	2	2	1	1	1	1	1	2	2
ccRCC	0	88	2	1	1	1	1	1	1	1	2
ccRCC	0	88	1	2	2	1	1	1	1	2	1
ccRCC	0	88	1	2	1	1	2	2	3	2	1
ccRCC	0	88	1	1	1	1	1	1	1	1	2
ccRCC	0	87	1	2	1	1	1	1	1	2	2
ccRCC	1	38	1	1	2	2	2	1	2	2	1
ccRCC	0	87	1	2	2	1	1	1	1	2	2
ccRCC	0	87	2	1	1	1	1	1	1	1	2
ccRCC	0	87	1	2	1	1	1	1	1	1	2
ccRCC	0	87	2	2	2	2	2	1	2	2	1
ccRCC	0	86	2	1	1	1	1	1	1	1	2
ccRCC	0	86	2	1	1	2	1	1	1	2	2
ccRCC	0	86	1	1	1	1	1	1	1	1	2
ccRCC	0	86	1	2	2	1	1	1	1	2	2
ccRCC	0	86	2	2	2	2	1	1	1	2	1
ccRCC	0	86	1	1	1	1	1	1	1	1	2
ccRCC	0	86	1	1	1	1	1	1	1	1	2
ccRCC	0	86	1	2	1	1	1	1	1	2	2
ccRCC	0	86	1	2	1	1	1	1	1	2	2
ccRCC	1	31	1	1	2	2	2	1	2	2	1
ccRCC	0	85	1	2	1	1	1	1	1	1	2
ccRCC	1	10	1	2	1	1	1	1	1	2	1
ccRCC	0	85	1	2	2	2	2	1	2	2	2
ccRCC	0	85	2	1	2	1	1	1	1	2	1
ccRCC	0	85	2	2	1	1	1	1	1	1	2
ccRCC	0	85	1	1	1	1	1	1	1	2	1
ccRCC	0	85	1	2	1	1	1	1	1	1	2
ccRCC	1	41	1	1	1	2	2	2	3	2	1
ccRCC	0	85	2	1	1	1	1	1	1	2	2
ccRCC	0	85	1	1	1	1	1	1	1	1	2
ccRCC	0	85	1	1	1	1	1	1	1	1	2
ccRCC	1	52	1	2	2	1	3	1	3	2	1
ccRCC	1	15	2	1	2	2	2	2	3	2	1
ccRCC	0	84	1	2	1	1	1	1	1	2	2
ccRCC	0	84	1	2	1	1	3	1	3	2	1
ccRCC	0	84	1	1	1	1	1	1	1	1	2
ccRCC	0	84	1	2	2	2	2	1	2	2	2
ccRCC	0	84	1	2	1	1	1	1	1	1	2
ccRCC	0	84	1	1	1	2	2	1	2	2	2
ccRCC	0	83	1	1	1	2	1	1	1	2	2
ccRCC	0	83	2	1	1	1	1	1	1	2	1
ccRCC	1	46	1	1	1	2	2	1	2	2	1
ccRCC	1	51	1	2	1	1	1	1	1	2	1
ccRCC	0	81	1	1	1	1	1	1	1	1	1
ccRCC	0	81	1	1	1	1	1	1	1	1	2
ccRCC	0	81	2	2	2	1	1	1	1	2	2
ccRCC	0	81	2	2	1	1	1	1	1	2	2
ccRCC	0	80	1	2	1	2	1	1	1	2	1
ccRCC	0	80	2	1	1	1	1	1	1	2	1
ccRCC	1	51	1	2	2	1	1	1	1	2	1
ccRCC	0	80	1	2	1	1	1	1	1	1	2
ccRCC	1	40	1	2	1	1	1	1	1	1	1
ccRCC	0	79	1	1	1	1	1	1	1	2	1
ccRCC	0	79	2	1	1	1	1	1	1	1	2
ccRCC	0	79	2	1	2	1	1	1	1	1	2
ccRCC	0	78	1	2	2	1	1	1	1	2	1
ccRCC	0	78	2	1	2	1	1	1	1	2	1
ccRCC	1	22	1	2	2	1	3	2	3	2	1
ccRCC	0	77	1	1	1	2	2	1	2	2	2
ccRCC	0	77	1	2	1	1	1	1	1	1	2
ccRCC	0	77	2	2	1	1	1	1	1	2	2
ccRCC	1	4	1	2	2	2	3	2	3	2	1
ccRCC	0	77	1	1	1	1	1	1	1	1	2
ccRCC	0	76	1	1	1	1	1	1	1	2	1
ccRCC	0	76	2	1	1	1	1	1	1	2	2
ccRCC	0	76	1	1	1	1	1	1	1	1	2
ccRCC	1	38	1	2	2	2	2	1	2	2	1
ccRCC	1	7	1	2	2	2	3	2	3	2	1
ccRCC	1	7	1	1	2	1	3	2	3	2	1
ccRCC	0	76	1	1	1	1	1	1	1	1	2
ccRCC	0	75	2	1	1	1	1	1	1	1	2
ccRCC	0	75	2	1	1	1	1	1	1	2	2
ccRCC	0	75	1	1	1	1	1	1	1	1	2
ccRCC	0	75	1	2	1	1	1	1	1	2	1
ccRCC	0	74	1	1	1	1	1	1	1	1	2
ccRCC	0	74	1	2	1	1	1	1	1	2	2
ccRCC	0	74	1	1	1	1	1	1	1	1	2
ccRCC	1	21	1	2	2	1	1	1	1	2	1
ccRCC	0	74	2	1	1	1	1	1	1	2	2
ccRCC	0	74	1	1	2	1	1	1	1	2	2
ccRCC	0	74	2	1	1	1	1	1	1	1	2
ccRCC	1	4	1	2	2	2	2	1	2	2	1
ccRCC	1	5	2	2	2	2	3	2	3	2	1
ccRCC	0	73	1	1	1	1	1	1	1	1	2
ccRCC	1	14	1	2	2	2	2	1	2	2	1
ccRCC	0	72	1	2	1	1	1	1	1	1	2
ccRCC	0	72	2	1	2	1	1	1	1	2	1
ccRCC	0	72	2	2	1	1	1	1	1	1	2
ccRCC	0	72	1	1	2	2	3	2	3	2	1
ccRCC	0	72	1	1	1	1	1	1	1	1	2
ccRCC	0	72	1	2	1	1	1	1	1	2	2
ccRCC	0	72	1	1	1	1	1	1	1	1	2
ccRCC	0	72	2	2	1	1	1	1	1	2	1
ccRCC	0	72	1	1	1	1	1	1	1	2	2
ccRCC	0	71	1	1	1	1	1	1	1	2	2
ccRCC	0	71	2	1	1	1	1	1	1	1	2
ccRCC	0	71	1	1	1	1	1	1	1	2	1
ccRCC	0	71	1	2	2	1	1	1	1	1	1
ccRCC	0	71	1	2	2	1	1	1	1	2	1
ccRCC	0	71	2	1	1	1	1	1	1	1	2
ccRCC	0	71	2	2	2	1	1	1	1	2	1
ccRCC	0	71	1	1	1	1	1	1	1	1	2
ccRCC	0	71	1	2	1	1	1	1	1	2	2
ccRCC	0	70	2	2	1	1	1	1	1	2	2
ccRCC	1	43	1	2	2	1	1	1	1	2	1
ccRCC	0	70	1	2	2	1	3	2	3	1	2
ccRCC	0	70	1	2	2	2	1	1	1	2	2
ccRCC	0	70	1	1	2	1	1	1	1	2	2
ccRCC	0	70	2	2	1	1	1	1	1	1	2
ccRCC	0	69	1	2	1	1	1	1	1	2	1
ccRCC	0	69	1	2	1	2	1	1	1	2	2
ccRCC	0	69	2	1	1	1	1	1	1	1	2
ccRCC	1	33	1	2	1	2	2	1	2	2	1
ccRCC	0	69	1	2	1	1	1	1	1	1	2
ccRCC	0	69	1	2	1	1	1	1	1	2	1
ccRCC	0	69	1	1	1	1	1	1	1	1	2
ccRCC	0	69	1	1	1	1	1	1	1	2	2
ccRCC	0	68	1	2	1	2	2	1	2	2	2
ccRCC	0	68	1	1	2	1	1	1	1	2	2
ccRCC	0	68	2	2	2	2	2	1	2	2	1
ccRCC	0	68	1	1	1	1	1	1	1	1	2
ccRCC	0	68	2	2	1	1	1	1	1	1	2
ccRCC	1	41	2	2	1	1	1	1	1	2	1
ccRCC	1	66	1	1	1	1	1	1	1	2	1
ccRCC	0	67	1	2	1	1	1	1	1	2	1
ccRCC	0	67	1	1	1	1	1	1	1	2	2
ccRCC	0	67	2	2	1	1	1	1	1	1	2
ccRCC	0	67	1	2	2	1	1	1	1	2	2
ccRCC	1	49	1	1	1	1	1	1	1	2	1
ccRCC	0	67	1	2	2	1	1	1	1	2	2
ccRCC	0	67	2	2	1	1	1	1	1	2	2
ccRCC	0	67	1	2	1	1	1	1	1	1	2
ccRCC	1	57	2	2	2	2	2	1	2	2	1
ccRCC	1	7	1	2	2	1	1	1	1	2	2
ccRCC	0	66	2	1	1	2	1	1	1	2	1
ccRCC	0	66	1	2	2	1	1	1	1	1	2
ccRCC	0	66	2	2	1	1	1	1	1	1	2
ccRCC	0	65	1	1	1	2	1	1	1	2	2
ccRCC	0	65	1	1	1	1	1	1	1	1	2
ccRCC	0	65	1	2	1	2	2	1	2	1	2
